# Supplementary material for: Cellulose Diacetate Aerogels with Low Drying Shrinkage, High-Efficient Thermal Insulation, and Superior Mechanical Strength
Source: MDPI journal article supplement (doi:10.3390/gels10030210), 2024-03-21
Supplement: s1 [file s1]

# Supporting Information

## *Cellulose Diacetate Aerogels with Low Drying Shrinkage, High-Efficient Thermal Insulation, Superior Mechanical Strength*

Sizhao Zhang <sup>1,2,3,\*</sup>, Kunming Lu <sup>1</sup>, Yangbiao Hu <sup>1</sup>, Guangyu Xu <sup>1</sup>, Jing Wang <sup>1</sup>, Yanrong Liao <sup>1</sup> and Shuai Yu <sup>1</sup>

<sup>1</sup> Polymer Aerogels Research Center, Jiangxi University of Science and Technology, Nanchang 330013, China

<sup>2</sup> Science and Technology on Advanced Ceramic Fibers and Composites Laboratory, National University of Defense Technology, Changsha 410073, China

<sup>3</sup> Postdoctoral Research Station on Mechanics, College of Aerospace Science and Engineering, National University of Defense Technology, Changsha 410073, China

\* Correspondence: zhangsz@jxust.edu.cn

## **Contents of Figures and Tables**

**Figure S1:** Photographs of the corresponding sol, initial gel, final gel and aerogel in preparing CDAAs processes. The respective stages for (a, e, i, m) CDAAs-T1, (b, f, j, n) CDAAs-T2, (c, g, k, o) CDAAs-T3, (d, h, l, p) CDAAs-T4.

**Figure S2:** XPS spectra of CDAAs: (a-c) CDAAs-T2P2, (d-f) CDAAs-T2P3, (g-i) CDAAs-T2P4.

**Table S1:** Chemical composition and corresponding properties of CDAAs.

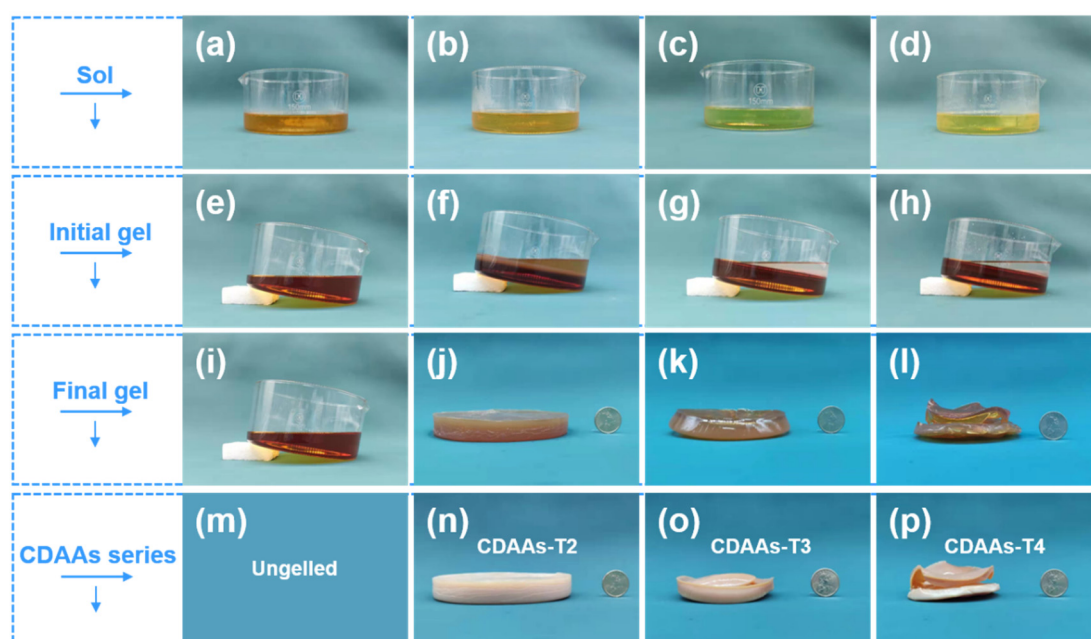

**Figure S1.** Photographs of the corresponding sol, initial gel, final gel and aerogel in preparing CDAAs processes. The respective stages for (a, e, i, m) CDAAs-T1, (b, f, j, n) CDAAs-T2, (c, g, k, o) CDAAs-T3, (d, h, l, p) CDAAs-T4.

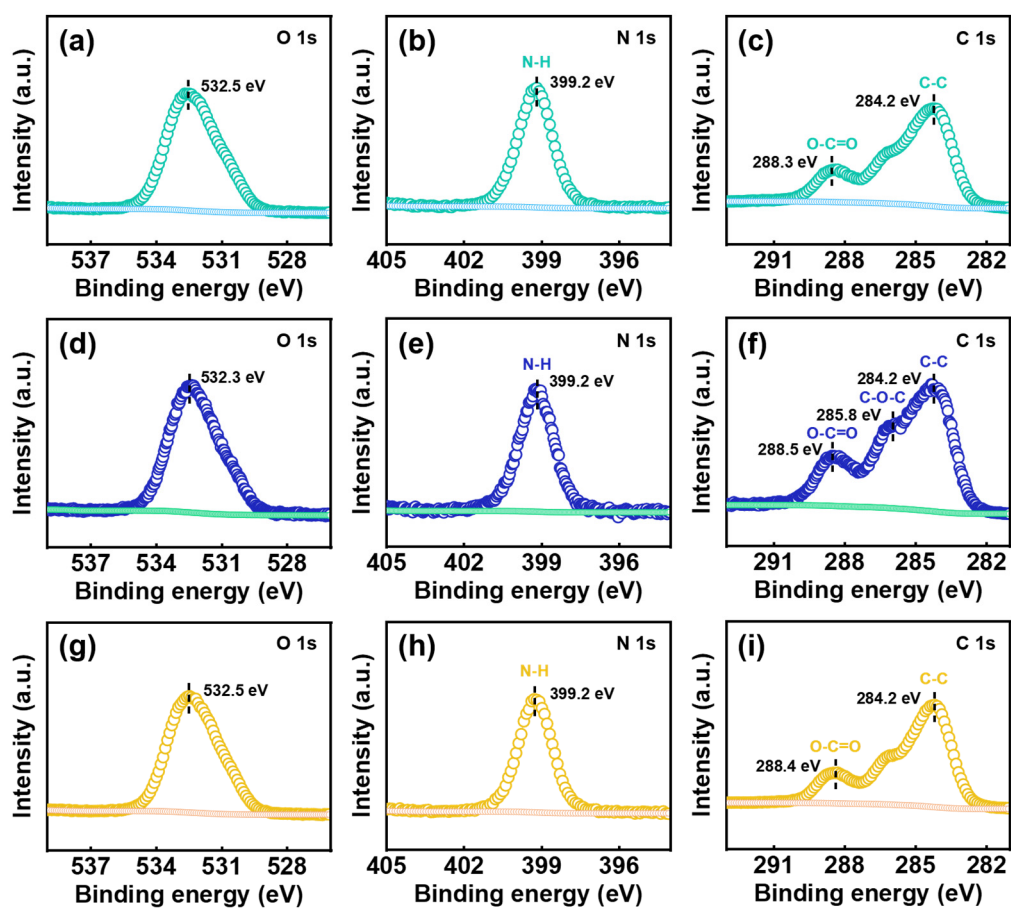

**Figure S2.** XPS spectra of CDAA-T2P2, (d-f) CDAA-T2P3, (g-i) CDAA-T2P4.

**Table S1.** Chemical composition and corresponding properties of CDAAs. Note: the preparation system all controlled in the sum volume of 300 mL; TC refers to thermal conductivity.

| Specimens  | CDA (g) | TDI (g) | Py (mL) | $\rho$ (g cm <sup>-3</sup> ) | TC (W m <sup>-1</sup> K <sup>-1</sup> ) |
|------------|---------|---------|---------|------------------------------|-----------------------------------------|
| CDAAs-T1   | 9       | 9.44    | 9.0     | —                            | —                                       |
| CDAAs-T2   | 9       | 10.20   | 9.0     | 0.073                        | 0.021                                   |
| CDAAs-T3   | 9       | 10.98   | 9.0     | 0.391                        | —                                       |
| CDAAs-T4   | 9       | 11.75   | 9.0     | 0.405                        | —                                       |
| CDAAs-T2P1 | 9       | 10.20   | 8.0     | 0.209                        | —                                       |
| CDAAs-T2P2 | 9       | 10.20   | 8.5     | 0.069                        | 0.025                                   |
| CDAAs-T2P3 | 9       | 10.20   | 9.0     | 0.073                        | 0.021                                   |
| CDAAs-T2P4 | 9       | 10.20   | 9.5     | 0.079                        | 0.023                                   |
| CDAAs-T2P5 | 9       | 10.20   | 10.0    | 0.223                        | 0.030                                   |
